# Supplementary material
Source: publisher site journal article supplement (https://www.degruyterbrill.com/publication/isbn/9783110495430/downloadAsset/9783110495430_Abbildungen_SUW25.zip)
Supplement: Supplementary file 1 [file 000_Verzeichnis der Abbildungen und Belege_Lasch_SUW_25.pdf › Abbildungen/000_Verzeichnis der Abbildungen und Belege_Lasch_SUW_25.pdf]

# Nonagentive Konstruktionen des Deutschen

## 1 Abbildungen

- Abb. 1:** Konstruktion der ASKRPTION (Subtyp der Prädikatsklasse ZUSTAND) mit *sein*. Direktlink: <https://goo.gl/Aew7P6>; Stand: 03.09.2016. CC BY-SA 4.0.
- Abb. 2:** Das Verb *mail* in der Ditransitiv-Konstruktion (nach Goldberg 1995: 53). Direktlink: <https://goo.gl/lPEkbL>; Stand: 03.09.2016. CC BY-SA 4.0.
- Abb. 3:** Das Verb *send* in der Ditransitiv-Konstruktion (nach Goldberg 1995: 55). Direktlink: <https://goo.gl/tmbRwj>; Stand: 03.09.2016. CC BY-SA 4.0.
- Abb. 4:** Interne Struktur einer Konstruktion nach Croft (2001: 176). Direktlink: <https://goo.gl/tmbRwj>; Stand: 03.09.2016. CC BY-SA 4.0.
- Abb. 5:** Das Verb *send* in der Ditransitiv-Konstruktion (nach Goldberg 1995: 55). Direktlink: <https://goo.gl/tmbRwj>; Stand: 03.09.2016. CC BY-SA 4.0.
- Abb. 6:** Das Verb *pflücken* in der Transitiv-Konstruktion im Aussagerahmen NEHMEN. Direktlink: <https://goo.gl/38lrNZ>; Stand: 03.09.2016. CC BY-SA 4.0.
- Abb. 7:** Die Einbettung des Verbs *geben* in die Ditransitiv-Konstruktion im Aussagerahmen HANDLUNG ‚GEBEN‘. Direktlink: <https://goo.gl/HvZMra>; Stand: 03.09.2016. CC BY-SA 4.0.
- Abb. 8:** Die Einbettung des Verbs *bauen* in die Ditransitiv-Konstruktion im Aussagerahmen HANDLUNG ‚GEBEN‘. Direktlink: <https://goo.gl/FkQpQL>; Stand: 03.09.2016. CC BY-SA 4.0.
- Abb. 9:** Die Einbettung des Verbs *pflücken* in die Ditransitiv-Konstruktion im Aussagerahmen HANDLUNG ‚GEBEN‘. Direktlink: <https://goo.gl/pKjfsE>; Stand: 03.09.2016. CC BY-SA 4.0.
- Abb. 10:** Die Einbettung der Verben *geben*, *bauen* und *pflücken* in die Ditransitiv-Konstruktion im Aussagerahmen HANDLUNG ‚GEBEN‘ in verschiedenen Relationen zwischen Konstruktions- und Verbbedeutung. Direktlink: <https://goo.gl/135cLU>; Stand: 03.09.2016. CC BY-SA 4.0.
- Abb. 11:** Perspektivische Darstellung mit einem Fluchtpunkt. Direktlink: <https://goo.gl/kO42gP>; Stand: 03.09.2016. CC BY-SA 4.0.
- Abb. 12:** Perspektivische Darstellung mit zwei Fluchtpunkten. Direktlink: <https://goo.gl/2aQxAe>; Stand: 03.09.2016. CC BY-SA 4.0.
- Abb. 13:** Modell der Origo nach Bühler (1934/1982: 102). Direktlink: <https://goo.gl/i4xQNs>; Stand: 03.09.2016. CC BY-SA 4.0.
- Abb. 14:** Interferenzen von „Zeigfeld“ und „Symbolfeld“. Direktlink: <https://goo.gl/BG761z>; Stand: 03.09.2016. CC BY-SA 4.0.
- Abb. 15:** Konstruktion der ASKRPTION (Subtyp der Prädikatsklasse ZUSTAND) mit *sein*. Direktlink: <https://goo.gl/Aew7P6>; Stand: 03.09.2016. CC BY-SA 4.0.
- Abb. 16:** Konstruktion der KOMMUTATION (Subtyp der Prädikatsklasse VORGANG) mit *werden*. Direktlink: <https://goo.gl/Znu59l>; Stand: 03.09.2016. CC BY-SA 4.0.
- Abb. 17:** Konstruktion der AKZEPTATION (Subtyp der Prädikatsklasse VORGANG) mit *bekommen*. Direktlink: <https://goo.gl/liXaC1>; Stand: 03.09.2016. CC BY-SA 4.0.
- Abb. 18:** Die Schichtung des KERN-Korpus unter der Angabe laufender Textwörter. Quelle: <http://www.dwds.de/ressourcen/kernkorpus/>. Direktlink: <https://goo.gl/kv1nVA>; Stand: 03.09.2016. CC BY-SA 4.0.
- Abb. 19:** Auszug aus der Übersicht über die Belegzahlen; alphabetische Sortierung der Qualitative. Direktlink: <https://goo.gl/Ve8bnc>; Stand: 03.09.2016. CC BY-SA 4.0.
- Abb. 20:** Auszug aus der Übersicht über die Belegzahlen; Sortierung nach der ermittelten Differenz der Belegzahlen je nach Suchstring im Korpus BERLINER ZEITUNG. Direktlink: <https://goo.gl/CT3ZW3>; Stand: 03.09.2016. CC BY-SA 4.0.
- Abb. 21:** Auszug aus der Übersicht über die Belegzahlen; Sortierung nach der ermittelten Differenz der Belegzahlen je nach Suchstring im KERN-Korpus. Direktlink: <https://goo.gl/7L3eXu>; Stand: 03.09.2016. CC BY-SA 4.0.
- Abb. 22:** Auszug aus der Übersicht über die Belegzahlen; Sortierung nach der ermittelten Differenz der Belegzahlen je nach Suchstring im Korpus ZEIT. Direktlink: <https://goo.gl/zNFYsU>; Stand: 03.09.2016. CC BY-SA 4.0.
- Abb. 23:** Signifikanztests (Auszug) für die Types, die mit der Suchabfrage `near(wirken,@[QUAL],5)` ermittelt worden sind. Direktlink: <https://goo.gl/O95xP5>; Stand: 03.09.2016. CC BY-SA 4.0.
- Abb. 24:** Signifikanztests (Auszug) für die Types, die mit der Suchabfrage `near(wirken,[QUAL],5)` ermittelt worden sind. Direktlink: <https://goo.gl/Hth8je>; Stand: 03.09.2016. CC BY-SA 4.0.
- Abb. 25:** Signifikanztests (Auszug) für die Types, die mit der Suchabfrage `near(wirken,@[QUAL],5)` ermittelt worden sind. Direktlink: <https://goo.gl/NTqL3N>; Stand: 03.09.2016. CC BY-SA 4.0.
- Abb. 26:** Signifikanztests (Auszug) für die Types, die mit der Suchabfrage `near(wirken,[QUAL],5)` ermittelt worden sind. Direktlink: <https://goo.gl/sKsfHL>; Stand: 03.09.2016. CC BY-SA 4.0.
- Abb. 27:** Abfrageroutinen und Belegzahlen für die Konstruktion der ASKRPTION mit *wirken* im Kernkorpus des DWDS (Präteritum und Perfekt Indikativ, ADJD). Direktlink: <https://goo.gl/NN0y7s>; Stand: 15.08.2016. CC BY-SA 4.0.
- Abb. 28:** Exemplarische Auswahl der Belege nach der halbautomatischen Sortierung und Vorauswahl, die mittels `"@wirkte #10 $p=ADJD" && !\,` im KERN-Korpus des DWDS ermittelt worden sind. Direktlink: <https://goo.gl/Vyj3iX>; Stand: 03.09.2016. CC BY-SA 4.0.

- Abb. 29:** Belege für Konstruktion *wirken* mit ADJD im Präteritum und Perfekt Indikativ, differenziert nach Art des annotierten QUAL (ADJD), Kommunikationsbereich (BE, GE, WI, ZE), Dekade (des 20. Jh.) und morphologischer Form des finiten Verbs. Direktlink: <https://goo.gl/AGTpRr>; Stand: 03.09.2016. CC BY-SA 4.0.
- Abb. 30:** Schätzwerte der Belege für Konstruktion *wirken* mit ADJD im Präteritum, differenziert nach Kommunikationsbereich (BE, GE, WI, ZE) und morphologischer Form des finiten Verbs. Direktlink: <https://goo.gl/Ohz6lj>; Stand: 03.09.2016. CC BY-SA 4.0.
- Abb. 31:** Konstruktion der ASKRPTION (Subtyp der Prädikatsklasse ZUSTAND) mit *sein*. Direktlink: <https://goo.gl/Aew7P6>; Stand: 03.09.2016. CC BY-SA 4.0.
- Abb. 32:** Konstruktion der ASKRPTION (Subtyp der Prädikatsklasse ZUSTAND) mit *sein* im Präsens Indikativ. Erfasst sind nur die mittels der Suchstrings ermittelten Belege. Direktlink: <https://goo.gl/otdau1>; Stand: 03.09.2016. Legende: <https://goo.gl/GRkY8p>. CC-BY-SA 4.0.
- Abb. 33:** Vergleich der ermittelten Belege N1 im KERN-Korpus nach eingebettetem Verb im Präsens Indikativ. Direktlink: <https://goo.gl/NRS3Qq>; Stand: 03.09.2016. CC BY-SA 4.0.
- Abb. 34:** Vergleich der ermittelten Belege N1 im KERN-Korpus nach eingebettetem Verb im Präsens Indikativ nach Anpassung der Erhebungsroutinen. Direktlink: <https://goo.gl/TFF9MV>; Stand: 03.09.2016. Legende: <https://goo.gl/GRkY8p>. CC BY-SA 4.0.
- Abb. 35:** Verteilung der abgefragten Belege N im KERN-Korpus auf die ausgewählten Jahrgänge. Direktlink: <https://goo.gl/6nimb>; Stand: 03.09.2016. CC BY-SA 4.0.
- Abb. 36:** Verteilung der abgefragten Belege N1 im KERN-Korpus auf die ausgewählten Jahrgänge. Direktlink: <https://goo.gl/5mzjmg>; Stand: 03.09.2016. CC BY-SA 4.0.
- Abb. 37:** Vergleich der mittels der Standardsuchroutinen aufgerufenen Belegzahlen (N und N1) für die Konstruktion mit *sein* und mit werden. Direktlink: <https://goo.gl/lP6G2E>; Stand: 16.08.2016. Legende: <https://goo.gl/GRkY8p>. CC BY-SA 4.0.
- Abb. 38:** Realisierungen der Konstruktion der ASKRPTION mit *sein* im Präsens und Präteritum Indikativ nach Anpassung der Erhebungsroutinen. Direktlink: <https://goo.gl/bppnbC>; Stand: 03.09.2016. Legende: <https://goo.gl/GRkY8p>. CC BY-SA 4.0.
- Abb. 39:** Realisierungen der Konstruktion der ASKRPTION mit *sein* im Perfekt und Plusquamperfekt nach Anpassung der Erhebungsroutinen. Die Abbildung kann abgerufen werden unter: <https://goo.gl/8QxfOs>; Stand: 03.09.2016. Legende: <https://goo.gl/GRkY8p>. CC BY-SA 4.0.
- Abb. 40:** Realisierungen der Konstruktion der ASKRPTION mit *sein* im Futur I nach Anpassung der Erhebungsroutinen. Die Abbildung kann abgerufen werden unter: <https://goo.gl/bkQG7l>; Stand: 03.09.2016. Legende: <https://goo.gl/GRkY8p>. CC BY-SA 4.0.
- Abb. 41:** Realisierungen der Konstruktion der ASKRPTION mit *sein* nach Tempora. Direktlink: <https://goo.gl/ogfQzj>; Stand: 03.09.2016. Legende: <https://goo.gl/GRkY8p>. CC BY-SA 4.0.
- Abb. 42:** Realisierungen der Konstruktion der ASKRPTION mit *sein* unter Berücksichtigung der Kommunikationsdomänen; Schätzung der Verteilung im Untersuchungsausschnitt nach angepassten Abfrageroutinen. Direktlink: <https://goo.gl/O8pXON>; Stand: 03.09.2016. Legende: <https://goo.gl/GRkY8p>. CC BY-SA 4.0.
- Abb. 43:** Verteilungen Qualitative und morphologische Formen von *sein* mit Angabe der Stellung des finiten Verbs. Direktlink: <https://goo.gl/Tzl2v6>; Stand: 03.09.2016. CC BY-SA 4.0.
- Abb. 44:** Chronologische Verteilung der Konstruktionsrealisierungen mit *sein* mit Angabe der morphologischen Formen. Direktlink: <https://goo.gl/OgtseK>; Stand: 03.09.2016. CC BY-SA 4.0.
- Abb. 45:** Verteilung der Konstruktionsrealisierungen mit *sein* nach morphologischen Formen des Verbs und mit Angabe der jeweiligen Gebrauchsdomänen. Die Abbildung kann abgerufen werden unter: <https://goo.gl/tdRMWP>; Stand: 03.09.2016. CC BY-SA 4.0.
- Abb. 46:** Die je 30 häufigsten Qualitative mit *sein* nach Annotationsart. Die Abbildung kann abgerufen werden unter: <https://goo.gl/h12MFi>; Stand: 03.09.2016. CC BY-SA 4.0.
- Abb. 47:** Lexikalisch maximal spezifizierte Realisierung der Konstruktion der ASKRPTION mit *sein* zu den Belegen [K2582], [K44268] sowie [K2489] und [K3891]. Direktlink: <https://goo.gl/jNfvLp>; Stand: 03.09.2016. CC BY-SA 4.0.
- Abb. 48:** Die je 30 häufigsten Qualitative mit *sein* nach Kommunikationsdomäne. Direktlink: <https://goo.gl/Btx9oN>; Stand: 03.09.2016. CC BY-SA 4.0.
- Abb. 49:** Die je 30 häufigsten Qualitative mit *sein* nach Tempus. Die Abbildung kann abgerufen werden unter: <https://goo.gl/eCzvA>; Stand: 03.09.2016. CC BY-SA 4.0.
- Abb. 50:** Konstruktion der ASKRPTION (Subtyp der Prädikatsklasse ZUSTAND) mit *bleiben* mit resultativer Relation zwischen Konstruktions- und Verbbedeutung. Direktlink: <https://goo.gl/quq4Hm>; Stand: 03.09.2016. CC BY-SA 4.0.
- Abb. 51:** Realisierungen der Konstruktion der ASKRPTION mit *bleiben* im Präsens. Zu dem Beleg mit *[[bleiben][[am][N]]]* in Z. 66 kommen noch vier Belege aus Kontrollabfragen mit anderen APPRART (*beim* und *im*) hinzu, die nur in der Gesamtzählung aller Belege berücksichtigt sind (vgl. unten Abb. 56; Präsens: 782). Direktlink: <https://goo.gl/pcN5r8>; Stand: 03.09.2016. Legende: <https://goo.gl/GRkY8p>. CC BY-SA 4.0.
- Abb. 52:** Realisierungen der Konstruktion der ASKRPTION mit *bleiben* im Präteritum. Ein weiterer Beleg aus Kontrollabfragen mit anderen APPRART (*im*) kommt hinzu, der nur in der Gesamtzählung aller Belege berücksichtigt ist (vgl. unten Abb. 56; Präteritum: 699). Direktlink: <https://goo.gl/MvEnRU>; Stand: 03.09.2016. Legende: <https://goo.gl/GRkY8p>. CC BY-SA 4.0.
- Abb. 53:** Realisierungen der Konstruktion der ASKRPTION mit *bleiben* im Perfekt. Direktlink: <https://goo.gl/kjCDAf>; Stand: 03.09.2016. Legende: <https://goo.gl/GRkY8p>. CC BY-SA 4.0.
- Abb. 54:** Realisierungen der Konstruktion der ASKRPTION mit *bleiben* im Plusquamperfekt. Direktlink: <https://goo.gl/DbXnYq>; Stand: 03.09.2016. Legende: <https://goo.gl/GRkY8p>. CC BY-SA 4.0.
- Abb. 55:** Realisierungen der Konstruktion der ASKRPTION mit *bleiben* im Futur I. Die Abbildung kann abgerufen werden unter: <https://goo.gl/Ciyk26>; Stand: 03.09.2016. Legende: <https://goo.gl/GRkY8p>. CC BY-SA 4.0.

- Abb. 56:** Realisierungen der Konstruktion der ASKRPTION mit *bleiben*. In den Belegsummen von Präsens und Präteritum (m) sind die Belege aus den Kontrollrechnungen berücksichtigt. Direktlink: <https://goo.gl/bM8Oyo>; Stand: 03.09.2016. Legende: <https://goo.gl/GRkY8p>. CC BY-SA 4.0.
- Abb. 57:** Realisierungen der Konstruktion der ASKRPTION mit *bleiben* unter Berücksichtigung der Kommunikationsdomänen; Schätzung der Verteilung im Untersuchungs- und Gesamtkorpus. Direktlink: <https://goo.gl/aWO4WK>; Stand: 03.09.2016. Legende: <https://goo.gl/GRkY8p>. CC BY-SA 4.0.
- Abb. 58:** Die Schichtung des KERN-Korpus unter der Angabe laufender Textwörter. Quelle: <http://www.dwds.de/ressourcen/kernkorpus/>. Die Abbildung kann abgerufen werden unter: <https://goo.gl/kv1nVA>; Stand: 03.09.2016. CC BY-SA 4.0.
- Abb. 59:** Chronologische Verteilung der Konstruktionsrealisierungen mit *bleiben* mit Angabe der jeweiligen Gebrauchsdomänen. Die Abbildung kann abgerufen werden unter: <https://goo.gl/FraSN6>; Stand: 03.09.2016. CC BY-SA 4.0.
- Abb. 60:** Chronologische Verteilung der Konstruktionsrealisierungen mit *bleiben* mit Angabe der jeweiligen Gebrauchsdomänen im statistisch normalisierten Korpus. Die Abbildung kann abgerufen werden unter: <https://goo.gl/mr7wOI>; Stand: 03.09.2016. CC BY-SA 4.0.
- Abb. 61:** Verteilung der Konstruktionsrealisierungen mit *bleiben* nach morphologischen Formen des Verbs und mit Angabe der jeweiligen Gebrauchsdomänen. Direktlink: <https://goo.gl/yzK8Gq>; Stand: 03.09.2016. CC BY-SA 4.0.
- Abb. 62:** Verteilungen Qualitative und morphologische Formen von *bleiben* mit Angabe der Stellung des finiten Verbs. Direktlink: <https://goo.gl/KOP1qb>; Stand: 03.09.2016. CC BY-SA 4.0.
- Abb. 63:** Chronologische Verteilung der Konstruktionsrealisierungen mit *bleiben* mit Angabe der morphologischen Formen. Direktlink: <https://goo.gl/PfjWt1>; Stand: 03.09.2016. CC BY-SA 4.0.
- Abb. 64:** Chronologische Verteilung der Konstruktionsrealisierungen mit *bleiben* mit Angabe der Art der Annotation der eingebetteten Qualitative. Die Abbildung kann abgerufen werden unter: <https://goo.gl/zkXa3e>; Stand: 03.09.2016. CC BY-SA 4.0.
- Abb. 65:** Die je 30 häufigsten Qualitative mit *bleiben* nach Annotationsart. Direktlink: <https://goo.gl/1CZU5V>; Stand: 03.09.2016. CC BY-SA 4.0.
- Abb. 66:** Die je 24 häufigsten Qualitative mit *bleiben* nach Annotationsart ADJD, die nach 1945 in WI, GE und ZE seltener verwendet werden. Direktlink: <https://goo.gl/K5mOYI>; Stand: 03.09.2016. CC BY-SA 4.0.
- Abb. 67:** Die je 30 häufigsten Qualitative mit *bleiben* nach Kommunikationsdomäne. Direktlink: <https://goo.gl/KXjn8v>; Stand: 03.09.2016. CC BY-SA 4.0.
- Abb. 68:** Die je 30 häufigsten Qualitative mit *bleiben* nach Tempus. Direktlink: <https://goo.gl/j8ZZdw>; Stand: 03.09.2016. CC BY-SA 4.0.
- Abb. 69:** Konstruktion der ASKRPTION (Subtyp der Prädikatsklasse ZUSTAND) mit modaler Relation zwischen Verb- und Konstruktionsbedeutung. Direktlink: <https://goo.gl/ezVrvB>; Stand: 03.09.2016. CC BY-SA 4.0.
- Abb. 70:** Konstruktion der ASKRPTION (Subtyp der Prädikatsklasse ZUSTAND) mit modaler Relation zwischen Konstruktions- und Verbbedeutung und *scheinen*. Direktlink: <https://goo.gl/vFd1jg>; Stand: 03.09.2016. CC BY-SA 4.0.
- Abb. 71:** Realisierungen der Konstruktion der ASKRPTION mit *scheinen*. In der Belegsumme des Präteritums (m) ist ein Beleg aus den Kontrollrechnungen berücksichtigt. Direktlink: <https://goo.gl/GmHp3D>; Stand: 03.09.2016. Legende: <https://goo.gl/GRkY8p>. CC BY-SA 4.0.
- Abb. 72:** Realisierungen der Konstruktion der ASKRPTION mit *scheinen* im Präsens. Direktlink: <https://goo.gl/kFNugW>; Stand: 03.09.2016. Legende: <https://goo.gl/GRkY8p>. CC BY-SA 4.0.
- Abb. 73:** Realisierungen der Konstruktion der ASKRPTION mit *scheinen* im Präteritum. Direktlink: <https://goo.gl/qieiaq>; Stand: 03.09.2016. Legende: <https://goo.gl/GRkY8p>. CC BY-SA 4.0.
- Abb. 74:** Realisierungen der Konstruktion der ASKRPTION mit *scheinen* unter Berücksichtigung der Kommunikationsdomänen; Schätzung der Verteilung im Untersuchungs- und Gesamtkorpus. Direktlink: <https://goo.gl/eXOdHq>; Stand: 03.09.2016. Legende: <https://goo.gl/GRkY8p>. CC BY-SA 4.0.
- Abb. 75:** Chronologische Verteilung der Konstruktionsrealisierungen mit *scheinen* mit Angabe der jeweiligen Gebrauchsdomänen. Direktlink: <https://goo.gl/pZxeN7>; Stand: 03.09.2016. CC BY-SA 4.0.
- Abb. 76:** Chronologische Verteilung der Konstruktionsrealisierungen mit *scheinen* mit Angabe der jeweiligen Gebrauchsdomänen. Direktlink: <https://goo.gl/quY9wY>; Stand: 03.09.2016. CC BY-SA 4.0.
- Abb. 77:** Verteilung der Konstruktionsrealisierungen mit *scheinen* nach morphologischen Formen des Verbs und mit Angabe der jeweiligen Gebrauchsdomänen. Direktlink: <https://goo.gl/XRnUVf>; Stand: 03.09.2016. CC BY-SA 4.0.
- Abb. 78:** Chronologische Verteilung der Qualitative in der Konstruktion der ASKRPTION mit *scheinen*. Direktlink: <https://goo.gl/tiuBqr>; Stand: 03.09.2016. CC BY-SA 4.0.
- Abb. 79:** Verteilungen Qualitative und morphologische Formen von *scheinen* mit Angabe der Stellung des finiten Verbs. Direktlink: <https://goo.gl/bDo1XT>; Stand: 03.09.2016. CC BY-SA 4.0.
- Abb. 80:** Chronologische Verteilung der Konstruktionsrealisierungen mit *scheinen* mit Angabe der morphologischen Formen. Direktlink: <https://goo.gl/pZxeN7>; Stand: 03.09.2016. CC BY-SA 4.0.
- Abb. 81:** Die je 30 häufigsten Qualitative mit *scheinen* nach Annotationsart. Direktlink: <https://goo.gl/Y9xeJY>; Stand: 03.09.2016. CC BY-SA 4.0.
- Abb. 82:** Die je 30 häufigsten Qualitative mit *scheinen* nach Kommunikationsdomäne. Direktlink: <https://goo.gl/uAN8qo>; Stand: 03.09.2016. CC BY-SA 4.0.
- Abb. 83:** Die je 30 häufigsten Qualitative mit *scheinen* nach Tempus. Direktlink: <https://goo.gl/8jUBmO>; Stand: 03.09.2016. CC BY-SA 4.0.
- Abb. 84:** Konstruktion der ASKRPTION (Subtyp der Prädikatsklasse ZUSTAND) mit modaler Relation zwischen Konstruktions- und Verbbedeutung und *erscheinen*. Direktlink: <https://goo.gl/spZ07z>; Stand: 03.09.2016. CC BY-SA 4.0.

- Abb. 85:** Realisierungen der Konstruktion der ASKRPTION mit *erscheinen* nach Tempora. Direktlink: <https://goo.gl/t9DJLA>; Stand: 03.09.2016. CC BY-SA 4.0.
- Abb. 86:** Realisierungen der Konstruktion der ASKRPTION mit *erscheinen* im Präsens. Direktlink: <https://goo.gl/ITlr6N>; Stand: 03.09.2016. Legende: <https://goo.gl/GRkY8p>. CC BY-SA 4.0.
- Abb. 87:** Realisierungen der Konstruktion der ASKRPTION mit *erscheinen* im Präteritum. Direktlink: <https://goo.gl/aOLv3U>; Stand: 03.09.2016. Legende: <https://goo.gl/GRkY8p>. CC BY-SA 4.0.
- Abb. 88:** Realisierungen der Konstruktion der ASKRPTION mit *erscheinen* im Perfekt. Direktlink: <https://goo.gl/DM7IA9>; Stand: 03.09.2016. Legende: <https://goo.gl/GRkY8p>. CC BY-SA 4.0.
- Abb. 89:** Realisierungen der Konstruktion der ASKRPTION mit *erscheinen* im Plusquamperfekt. Direktlink: <https://goo.gl/pfwTwM>; Stand: 03.09.2016. Legende: <https://goo.gl/GRkY8p>. CC BY-SA 4.0.
- Abb. 90:** Realisierungen der Konstruktion der ASKRPTION mit *erscheinen* unter Berücksichtigung der Kommunikationsdomänen; Schätzung der Verteilung im Untersuchungs- und Gesamtkorpus. Direktlink: <https://goo.gl/TLd6Gd>; Stand: 03.09.2016. CC BY-SA 4.0.
- Abb. 91:** Chronologische Verteilung der Konstruktionsrealisierungen mit *erscheinen* mit Angabe der jeweiligen Gebrauchsdomänen. Direktlink: <https://goo.gl/80RYQK>; Stand: 03.09.2016. CC BY-SA 4.0.
- Abb. 92:** Chronologische Verteilung der Konstruktionsrealisierungen mit *erscheinen* mit Angabe der jeweiligen Gebrauchsdomänen im normalisierten Korpus. Direktlink: <https://goo.gl/5L5CKZ>; Stand: 03.09.2016. CC BY-SA 4.0.
- Abb. 93:** Verteilung der Konstruktionsrealisierungen mit *erscheinen* nach morphologischen Formen des Verbs und mit Angabe der jeweiligen Gebrauchsdomänen. Direktlink: <https://goo.gl/3n31rs>; Stand: 03.09.2016. CC BY-SA 4.0.
- Abb. 94:** Chronologische Verteilung der Qualitative in der Konstruktion der ASKRPTION mit *scheinen*. Direktlink: <https://goo.gl/5YOo88>; Stand: 03.09.2016. CC BY-SA 4.0.
- Abb. 95:** Verteilungen Qualitative und morphologische Formen von *erscheinen* mit Angabe der Stellung des finiten Verbs. Direktlink: <https://goo.gl/elOyWQ>; Stand: 03.09.2016. CC BY-SA 4.0.
- Abb. 96:** Chronologische Verteilung der Konstruktionsrealisierungen mit *erscheinen* mit Angabe der morphologischen Formen. Direktlink: <https://goo.gl/H6tRBh>; Stand: 03.09.2016. CC BY-SA 4.0.
- Abb. 97:** Die je 30 häufigsten Qualitative mit *erscheinen* nach Annotationsart. Direktlink: <https://goo.gl/9TN13W>; Stand: 03.09.2016. CC BY-SA 4.0.
- Abb. 98:** Die je 30 häufigsten Qualitative mit *erscheinen* nach Kommunikationsdomäne. Direktlink: <https://goo.gl/7ntT6X>; Stand: 03.09.2016. CC BY-SA 4.0.
- Abb. 99:** Die je 30 häufigsten Qualitative mit *erscheinen* nach Tempus. Direktlink: <https://goo.gl/7jmRoj>; Stand: 03.09.2016. CC BY-SA 4.0.
- Abb. 100:** Konstruktion der ASKRPTION (Subtyp der Prädikatsklasse ZUSTAND) mit modaler Relation zwischen Verb- und Konstruktionsbedeutung und *wirken*. Direktlink: <https://goo.gl/ywmCmB>; Stand: 03.09.2016. CC BY-SA 4.0.
- Abb. 101:** Realisierungen der Konstruktion der ASKRPTION<sup>V(=modal)</sup> mit *wirken* nach Tempora. Direktlink: <https://goo.gl/24DvUe>; Stand: 03.09.2016. CC BY-SA 4.0.
- Abb. 102:** Realisierungen der Konstruktion der ASKRPTION<sup>V(=modal)</sup> mit *wirken* im Präsens. Direktlink: <https://goo.gl/kwYdAg>; Stand: 03.09.2016. Legende: <https://goo.gl/GRkY8p>. CC BY-SA 4.0.
- Abb. 103:** Realisierungen der Konstruktion der ASKRPTION<sup>V(=modal)</sup> mit *wirken* im Präteritum. Direktlink: <https://goo.gl/yJRNOj>; Stand: 03.09.2016. Legende: <https://goo.gl/GRkY8p>. CC BY-SA 4.0.
- Abb. 104:** Realisierungen der Konstruktion der ASKRPTION<sup>V(=modal)</sup> mit *wirken* unter Berücksichtigung der Kommunikationsdomänen; Schätzung der Verteilung im Untersuchungs- und Gesamtkorpus. Direktlink: <https://goo.gl/8squNJ>; Stand: 03.09.2016. Legende: <https://goo.gl/GRkY8p>. CC BY-SA 4.0.
- Abb. 105:** Chronologische Verteilung der Konstruktionsrealisierungen mit *wirken* mit Angabe der jeweiligen Gebrauchsdomänen. Direktlink: <https://goo.gl/PNKGiV>; Stand: 03.09.2016. CC BY-SA 4.0.
- Abb. 106:** Chronologische Verteilung der Konstruktionsrealisierungen mit *wirken* mit Angabe der jeweiligen Gebrauchsdomänen im normalisierten Korpus. Direktlink: <https://goo.gl/MR2kRs>; Stand: 03.09.2016. CC BY-SA 4.0.
- Abb. 107:** Verteilung der Konstruktionsrealisierungen mit *wirken* nach morphologischen Formen des Verbs und mit Angabe der jeweiligen Gebrauchsdomänen. Direktlink: <https://goo.gl/rnHXhR>; Stand: 03.09.2016. CC BY-SA 4.0.
- Abb. 108:** Chronologische Verteilung der Qualitative in der Konstruktion der ASKRPTION<sup>V(=modal)</sup> mit *wirken*. Direktlink: <https://goo.gl/Y5Zjwr>; Stand: 03.09.2016. CC BY-SA 4.0.
- Abb. 109:** Anzahl der Realisierungen von Konstruktionen der ASKRPTION<sup>V(=modal)</sup> mit *wirken* und VVPP als QUAL. Direktlink: <http://goo.gl/5vrXKa>; Stand: 03.09.2016. CC BY-SA 4.0.
- Abb. 110:** Verteilungen Qualitative und morphologische Formen von *wirken* mit Angabe der Stellung des finiten Verbs. Direktlink: <https://goo.gl/7nrpfv>; Stand: 03.09.2016. CC BY-SA 4.0.
- Abb. 111:** Die je 30 häufigsten Qualitative mit *wirken* nach Annotationsart. Direktlink: <https://goo.gl/dDU9IC>; Stand: 03.09.2016. CC BY-SA 4.0.
- Abb. 112:** Die je 30 häufigsten Qualitative mit *wirken* nach Kommunikationsdomäne. Direktlink: <https://goo.gl/6RCI9c>; Stand: 03.09.2016. CC BY-SA 4.0.
- Abb. 113:** Die je 30 häufigsten Qualitative mit *wirken* nach Tempus. Direktlink: <https://goo.gl/wnggvq>; Stand: 03.09.2016. CC BY-SA 4.0.
- Abb. 114:** Konstruktion der ASKRPTION (Subtyp der Prädikatsklasse ZUSTAND) mit modaler Relation zwischen Verb- und Konstruktionsbedeutung und *aussehen*. Direktlink: <https://goo.gl/WmhInI>; Stand: 03.09.2016. CC BY-SA 4.0.
- Abb. 115:** Realisierungen der Konstruktion der ASKRPTION mit *aussehen* nach Tempora. Direktlink: <https://goo.gl/ODVKHo>; Stand: 03.09.2016. CC BY-SA 4.0.

- Abb. 116:** Realisierungen der Konstruktion der ASKRIPTION mit *aussehen* im Präsens und Präteritum. Direktlink: <https://goo.gl/dWzowo>; Stand: 03.09.2016. Legende: <https://goo.gl/GRkY8p>. CC BY-SA 4.0.
- Abb. 117:** Realisierungen der Konstruktion der ASKRIPTION mit *aussehen* im Perfekt und Plusquamperfekt. Direktlink: <https://goo.gl/7c6jZD>; Stand: 03.09.2016. Legende: <https://goo.gl/GRkY8p>. CC BY-SA 4.0.
- Abb. 118:** Realisierungen der Konstruktion der ASKRIPTION mit *aussehen* unter Berücksichtigung der Kommunikationsdomänen; Schätzung der Verteilung im Untersuchungs- und Gesamtkorpus. Direktlink: <https://goo.gl/hnYDwl>; Stand: 03.09.2016. Legende: <https://goo.gl/GRkY8p>. CC BY-SA 4.0.
- Abb. 119:** Chronologische Verteilung der Konstruktionsrealisierungen mit *aussehen* mit Angabe der jeweiligen Gebrauchsdomänen. Direktlink: <https://goo.gl/XjFYnP>; Stand: 03.09.2016. CC BY-SA 4.0.
- Abb. 120:** Chronologische Verteilung der Konstruktionsrealisierungen mit *aussehen* mit Angabe der jeweiligen Gebrauchsdomänen im normalisierten Korpus. Direktlink: <https://goo.gl/3iFzNz>; Stand: 03.09.2016. CC BY-SA 4.0.
- Abb. 121:** Verteilung der Konstruktionsrealisierungen mit *aussehen* nach morphologischen Formen des Verbs und mit Angabe der jeweiligen Gebrauchsdomänen. Direktlink: <https://goo.gl/1wmU8O>; Stand: 03.09.2016. CC BY-SA 4.0.
- Abb. 122:** Chronologische Verteilung der Qualitative in der Konstruktion der ASKRIPTION mit *aussehen*. Direktlink: <https://goo.gl/tgrxld>; Stand: 03.09.2016. CC BY-SA 4.0.
- Abb. 123:** Verteilungen Qualitative und morphologische Formen von *aussehen* mit Angabe der Stellung des finiten Verbs. Direktlink: <https://goo.gl/EzTfhv>; Stand: 03.09.2016. CC BY-SA 4.0.
- Abb. 124:** Chronologische Verteilung der Konstruktionsrealisierungen mit *aussehen* mit Angabe der morphologischen Formen. Direktlink: <https://goo.gl/Oh6XZB>; Stand: 03.09.2016. CC BY-SA 4.0.
- Abb. 125:** Die je 30 häufigsten Qualitative mit *aussehen* nach Kommunikationsdomäne. Direktlink: <https://goo.gl/BVpF9F>; Stand: 03.09.2016. CC BY-SA 4.0.
- Abb. 126:** Die je 30 häufigsten Qualitative mit *aussehen* nach Annotationsart. Direktlink: <https://goo.gl/nbQWwO>; Stand: 03.09.2016. CC BY-SA 4.0.
- Abb. 127:** Die je 30 häufigsten Qualitative mit *aussehen* nach Tempus. Direktlink: <https://goo.gl/DhoiCF>; Stand: 03.09.2016. CC BY-SA 4.0.
- Abb. 128:** Konstruktion der KOMMUTATION (Subtyp der Prädikatsklasse VORGANG) mit *werden*. Direktlink: <https://goo.gl/Znu59I>; Stand: 03.09.2016. CC BY-SA 4.0.
- Abb. 129:** Konstruktion der KOMMUTATION (Subtyp der Prädikatsklasse ZUSTAND) mit *werden* im Präsens Indikativ. Erfasst sind nur die mittels der Suchstrings ermittelten Belege. Die vollständige Übersicht (über alle Tempora) kann abgerufen werden unter: <https://goo.gl/2hoQmA>; Stand: 03.09.2016. Legende: <https://goo.gl/GRkY8p>. CC BY-SA 4.0.
- Abb. 130:** Vergleich der mittels der Standardsuchroutinen aufgerufenen Belegzahlen (N und N1) für die Konstruktion der ASKRIPTION mit *sein* und der Konstruktion der KOMMUTATION mit *werden*. Direktlink: <https://goo.gl/lP6G2E>; Stand: 03.09.2016. CC BY-SA 4.0.
- Abb. 131:** Realisierungen der Konstruktion der KOMMUTATION mit *werden* nach Anpassung der Abfrageroutinen nach Tempora. Direktlink: <https://goo.gl/OKEVHc>; Stand: 03.09.2016. CC BY-SA 4.0.
- Abb. 132a und b:** Realisierungen der Konstruktion der KOMMUTATION mit *werden* nach Anpassung der Abfrageroutinen. Direktlink: <https://goo.gl/xJNWBA>; Stand: 03.09.2016. CC BY-SA 4.0.
- Abb. 133:** Realisierungen der Konstruktion der KOMMUTATION mit *werden* unter Berücksichtigung der Kommunikationsdomänen; Schätzung der Verteilung im Korpusausschnitt. Direktlink: <https://goo.gl/5LH62O>; Stand: 03.09.2016. CC BY-SA 4.0.
- Abb. 134:** Verteilung der Konstruktionsrealisierungen mit *werden* nach morphologischen Formen des Verbs und mit Angabe der jeweiligen Gebrauchsdomänen im Korpusausschnitt. Direktlink: <https://goo.gl/TD8RHm>; Stand: 03.09.2016. CC BY-SA 4.0.
- Abb. 135:** Verteilungen Qualitative und morphologische Formen von *werden* mit Angabe der Stellung des finiten Verbs im Korpusausschnitt. Direktlink: <https://goo.gl/L9zxzr>; Stand: 03.09.2016. CC BY-SA 4.0.
- Abb. 136:** Chronologische Verteilung der Konstruktionsrealisierungen mit *werden* mit Angabe der morphologischen Formen. Direktlink: <https://goo.gl/4kQcCF>; Stand: 03.09.2016. CC BY-SA 4.0.
- Abb. 137:** Chronologische Verteilung der Konstruktionsrealisierungen mit *werden* mit Angabe der jeweiligen Gebrauchsdomänen im Korpusausschnitt. Direktlink: <https://goo.gl/GpbqFn>; Stand: 03.09.2016. CC BY-SA 4.0.
- Abb. 138:** Die je 30 häufigsten Qualitative mit *werden* nach Annotationsart im Korpusausschnitt. Direktlink: <https://goo.gl/TQXEfg>; Stand: 03.09.2016. CC BY-SA 4.0.
- Abb. 139:** Die je 30 häufigsten Qualitative mit *werden* nach Kommunikationsdomäne im Korpusausschnitt. Direktlink: <https://goo.gl/AiCsRI>; Stand: 03.09.2016. CC BY-SA 4.0.
- Abb. 140:** Die je 30 häufigsten Qualitative mit *werden* nach Tempus im Korpusausschnitt. Direktlink: <https://goo.gl/su0OeS>; Stand: 03.09.2016. CC BY-SA 4.0.
- Abb. 141:** Das ‚unpersönliche Passiv‘ als Konstruktion der KOMMUTATION mit *werden*. Direktlink: <https://goo.gl/athrpy>; Stand: 03.09.2016. CC BY-SA 4.0.
- Abb. 142:** Konstruktion der AKZEPTATION (Subtyp der Prädikatsklasse VORGANG) mit *bekommen*. Direktlink: <https://goo.gl/liXaC1>; Stand: 03.09.2016. CC BY-SA 4.0.
- Abb. 143:** Realisierungen der Konstruktion der AKZEPTATION mit *bekommen* nach Tempora. Direktlink: <https://goo.gl/9DQh0D>; Stand: 03.09.2016. CC BY-SA 4.0.
- Abb. 144:** Realisierungen der Konstruktion der AKZEPTATION mit *bekommen* im Präteritum. Direktlink: <https://goo.gl/JXTRsJ>; Stand: 03.09.2016. Legende: <https://goo.gl/GRkY8p>. CC BY-SA 4.0.
- Abb. 145:** Realisierungen der Konstruktion der AKZEPTATION mit *bekommen* im Präteritum. Direktlink: <https://goo.gl/JXTRsJ>; Stand: 03.09.2016. Legende: <https://goo.gl/GRkY8p>. CC BY-SA 4.0.

- Abb. 146:** Realisierungen der Konstruktion der AKZEPTATION mit *bekommen* im Perfekt. Direktlink: <https://goo.gl/ssuYKo>; Stand: 03.09.2016. Legende: <https://goo.gl/GRkY8p>. CC BY-SA 4.0.
- Abb. 147:** Realisierungen der Konstruktion der AKZEPTATION mit *bekommen* im Plusquamperfekt. Direktlink: <https://goo.gl/MecV0J>; Stand: 03.09.2016. Legende: <https://goo.gl/GRkY8p>. CC BY-SA 4.0.
- Abb. 148:** Realisierungen der Konstruktion der AKZEPTATION mit *bekommen* im Futur I. Direktlink: <https://goo.gl/icMBM3>; Stand: 03.09.2016. Legende: <https://goo.gl/GRkY8p>. CC BY-SA 4.0.
- Abb. 149:** Realisierungen der Konstruktion der AKZEPTATION mit *bekommen* unter Berücksichtigung der Kommunikationsdomänen; Schätzung der Verteilung im Untersuchungs- und Gesamtkorpus. Direktlink: <https://goo.gl/g9pP2v>; Stand: 03.09.2016. Legende: <https://goo.gl/GRkY8p>. CC BY-SA 4.0.
- Abb. 150:** Chronologische Verteilung der Konstruktionsrealisierungen mit *bekommen* mit Angabe der jeweiligen Gebrauchsdomänen. Direktlink: <https://goo.gl/vSgLRo>; Stand: 03.09.2016. CC BY-SA 4.0.
- Abb. 151:** Chronologische Verteilung der Konstruktionsrealisierungen mit *bekommen* mit Angabe der jeweiligen Gebrauchsdomänen. Direktlink: <https://goo.gl/vSgLRo>; Stand: 03.09.2016. CC BY-SA 4.0.
- Abb. 152:** Chronologische Verteilung der Konstruktionsrealisierungen mit *bekommen* mit Angabe der jeweiligen Gebrauchsdomänen. Direktlink: <https://goo.gl/O6gbDP>; Stand: 03.09.2016. CC BY-SA 4.0.
- Abb. 153:** Chronologische Verteilung der Konstruktionsrealisierungen mit *bekommen* mit Angabe der jeweiligen Gebrauchsdomänen. Direktlink: <https://goo.gl/1wtlPJ>; Stand: 03.09.2016. CC BY-SA 4.0.
- Abb. 154:** Realisierung der 20 häufigsten Qualitative in den Konstruktionsrealisierungen mit *bekommen* in der ersten und zweiten Hälfte des 20. Jahrhunderts in den Domänen ZE und GE. Direktlink: <https://goo.gl/g68eYn>; Stand: 03.09.2016. CC BY-SA 4.0.
- Abb. 155:** Chronologische Verteilung der Konstruktionsrealisierungen mit *bekommen* mit Angabe der morphologischen Formen. Direktlink: <https://goo.gl/kQyA00>; Stand: 03.09.2016. CC BY-SA 4.0.
- Abb. 156:** Verteilungen Qualitative und morphologische Formen von *bekommen* mit Angabe der Stellung des finiten Verbs. Direktlink: <https://goo.gl/2zPGe8>; Stand: 03.09.2016. CC BY-SA 4.0.
- Abb. 157:** Die je 30 häufigsten Qualitative mit *bekommen* nach Annotationsart. Direktlink: <https://goo.gl/FWai7z>; Stand: 03.09.2016. CC BY-SA 4.0.
- Abb. 158:** Die je 30 häufigsten Qualitative mit *bekommen* nach Kommunikationsdomäne. Direktlink: <https://goo.gl/L9a3Lz>; Stand: 03.09.2016. CC BY-SA 4.0.
- Abb. 159:** Die je 30 häufigsten Qualitative mit *bekommen* nach Tempus. Direktlink: <https://goo.gl/cP9P1E>; Stand: 03.09.2016. CC BY-SA 4.0.
- Abb. 160:** Konstruktion der AKZEPTATION mit direkter Relation zwischen Verb- und Konstruktionsbedeutung und *kriegen*. Direktlink: <https://goo.gl/idsVhd>; Stand: 03.09.2016. CC BY-SA 4.0.
- Abb. 161:** Realisierungen der Konstruktion der AKZEPTATION mit *kriegen* nach Tempora. Direktlink: <https://goo.gl/VX02r5>; Stand: 03.09.2016. CC BY-SA 4.0.
- Abb. 162:** Realisierungen der Konstruktion der AKZEPTATION mit *kriegen* im Präsens. Direktlink: <https://goo.gl/sd9sjQ>; Stand: 03.09.2016. Legende: <https://goo.gl/GRkY8p>. CC BY-SA 4.0.
- Abb. 163:** Realisierungen der Konstruktion der AKZEPTATION mit *kriegen* im Präteritum. Direktlink: <https://goo.gl/1TU88M>; Stand: 03.09.2016. Legende: <https://goo.gl/GRkY8p>. CC BY-SA 4.0.
- Abb. 164:** Realisierungen der Konstruktion der AKZEPTATION mit *kriegen* im Perfekt. Direktlink: <https://goo.gl/oCK5u0>; Stand: 03.09.2016. Legende: <https://goo.gl/GRkY8p>. CC BY-SA 4.0.
- Abb. 165:** Realisierungen der Konstruktion der AKZEPTATION mit *kriegen* im Plusquamperfekt. Direktlink: <https://goo.gl/r5KWlZ>; Stand: 03.09.2016. Legende: <https://goo.gl/GRkY8p>. CC BY-SA 4.0.
- Abb. 166:** Verteilungen Qualitative und morphologische Formen von *kriegen* mit Angabe der Stellung des finiten Verbs. Direktlink: <https://goo.gl/d32bYs>; Stand: 03.09.2016. CC BY-SA 4.0.
- Abb. 167:** Chronologische Verteilung der Konstruktionsrealisierungen mit *kriegen* mit Angabe der jeweiligen Gebrauchsdomänen. Direktlink: <https://goo.gl/3D3KgF>; Stand: 03.09.2016. CC BY-SA 4.0.
- Abb. 168:** Chronologische Verteilung der Konstruktionsrealisierungen mit *kriegen* mit Angabe der jeweiligen Gebrauchsdomänen im normalisierten Korpus. Direktlink: <https://goo.gl/za2R49>; Stand: 03.09.2016. CC BY-SA 4.0.
- Abb. 169:** Verteilung der Konstruktionsrealisierungen mit *aussehen* nach morphologischen Formen des Verbs und mit Angabe der jeweiligen Gebrauchsdomänen. Direktlink: <https://goo.gl/vpEdhC>; Stand: 03.09.2016. CC BY-SA 4.0.
- Abb. 170:** Chronologische Verteilung der Konstruktionsrealisierungen mit *kriegen* mit Angabe der Qualitative. Direktlink: <https://goo.gl/klwBqU>; Stand: 03.09.2016. CC BY-SA 4.0.
- Abb. 171:** Chronologische Verteilung der Konstruktionsrealisierungen mit *kriegen* mit Angabe der morphologischen Formen. Direktlink: <https://goo.gl/Bff7uD>; Stand: 03.09.2016. CC BY-SA 4.0.
- Abb. 172:** Die Qualitative mit *kriegen* nach Annotationsart. Direktlink: <https://goo.gl/KqNllj>; Stand: 03.09.2016. CC BY-SA 4.0.
- Abb. 173:** Die Qualitative mit *kriegen* nach Kommunikationsdomäne. Direktlink: <https://goo.gl/4KvhaL>; Stand: 03.09.2016. CC BY-SA 4.0.
- Abb. 174:** Konstruktion der AKZEPTATION mit direkter Relation zwischen Verb- und Konstruktionsbedeutung und *erhalten*. Direktlink: <https://goo.gl/7xZaZF>; Stand: 03.09.2016. CC BY-SA 4.0.
- Abb. 175:** Realisierungen der Konstruktion der AKZEPTATION mit *erhalten* nach Tempora. Direktlink: <https://goo.gl/V86Fvm>; Stand: 03.09.2016. CC BY-SA 4.0.
- Abb. 176:** Realisierungen der Konstruktion der AKZEPTATION mit *erhalten* im Präsens. Direktlink: <https://goo.gl/2McNjl>; Stand: 03.09.2016. Legende: <https://goo.gl/GRkY8p>. CC BY-SA 4.0.
- Abb. 177:** Realisierungen der AKZEPTATION mit *erhalten* im Präteritum. Direktlink: <https://goo.gl/wljn3u>; Stand: 03.09.2016. Legende: <https://goo.gl/GRkY8p>. CC BY-SA 4.0.

- Abb. 178:** Realisierungen der Konstruktion der AKZEPTATION mit *erhalten* im Perfekt. Direktlink: <https://goo.gl/YzCgpn>; Stand: 03.09.2016. Legende: <https://goo.gl/GRkY8p>. CC BY-SA 4.0.
- Abb. 179:** Realisierungen der Konstruktion der AKZEPTATION mit *erhalten* im Plusquamperfekt. Direktlink: <https://goo.gl/LfcigV>; Stand: 03.09.2016. Legende: <https://goo.gl/GRkY8p>. CC BY-SA 4.0.
- Abb. 180:** Realisierungen der Konstruktion der AKZEPTATION mit *erhalten* unter Berücksichtigung der Kommunikationsdomänen; Schätzung der Verteilung im Untersuchungs- und Gesamtkorpus. Direktlink: <https://goo.gl/XgYbwm>; Stand: 03.09.2016. Legende: <https://goo.gl/GRkY8p>. CC BY-SA 4.0.
- Abb. 181:** Chronologische Verteilung der Konstruktionsrealisierungen mit *erhalten* mit Angabe der jeweiligen Gebrauchsdomänen. Direktlink: <https://goo.gl/5vAxqC>; Stand: 03.09.2016. CC BY-SA 4.0.
- Abb. 182:** Chronologische Verteilung der Konstruktionsrealisierungen mit *erhalten* mit Angabe der jeweiligen Gebrauchsdomänen im normalisierten Korpus. Direktlink: <https://goo.gl/Wks3bd>; Stand: 03.09.2016. CC BY-SA 4.0.
- Abb. 183:** Chronologische Verteilung der Konstruktionsrealisierungen mit *erhalten* mit Angabe der realisierten Qualitative. Direktlink: <https://goo.gl/STGFsk>; Stand: 03.09.2016. CC BY-SA 4.0.
- Abb. 184:** Chronologische Verteilung der Konstruktionsrealisierungen mit *erhalten* mit Angabe der morphologischen Formen. Direktlink: <https://goo.gl/Db6xEv>; Stand: 03.09.2016. CC BY-SA 4.0.
- Abb. 185:** Verteilung der Konstruktionsrealisierungen mit *erhalten* nach morphologischen Formen des Verbs und mit Angabe der jeweiligen Gebrauchsdomänen. Direktlink: <https://goo.gl/4BKThq>; Stand: 03.09.2016. CC BY-SA 4.0.
- Abb. 186:** Verteilungen Qualitative und morphologische Formen von *erhalten* mit Angabe der Stellung des finiten Verbs. Direktlink: <https://goo.gl/74W2EP>; Stand: 03.09.2016. CC BY-SA 4.0.
- Abb. 187:** Die je 30 häufigsten Qualitative mit *erhalten* nach Annotationsart. Direktlink: <https://goo.gl/dwFnla>; Stand: 03.09.2016. CC BY-SA 4.0.
- Abb. 188:** Die je 30 häufigsten Qualitative mit *erhalten* nach Kommunikationsdomäne. Direktlink: <https://goo.gl/Wtlws4>; Stand: 03.09.2016. CC BY-SA 4.0.
- Abb. 189:** Die je 30 häufigsten Qualitative mit *erhalten* nach Tempus. Direktlink: <https://goo.gl/PZGyTZ>; Stand: 03.09.2016. CC BY-SA 4.0.
- Abb. 190:** Realisierungen der Konstruktion der ASKRPTION mit *scheinen* unter Berücksichtigung der Kommunikationsdomänen; Schätzung der Verteilung im Untersuchungs- und Gesamtkorpus. Direktlink: <https://goo.gl/eX0dHq>; Stand: 03.09.2016. Legende: <https://goo.gl/GRkY8p>. CC BY-SA 4.0.
- Abb. 191:** Konstruktion der ASKRPTION mit Relation des intendierten Resultats zwischen Verb- und Konstruktionsbedeutung mit *gehören*. Direktlink: <https://goo.gl/8xYSLS>; Stand: 03.09.2016. CC BY-SA 4.0.
- Abb. 192:** Konstruktion der KOMMUTATION mit Relation des intendierten Resultats zwischen Verb- und Konstruktionsbedeutung mit *gehören*. Direktlink: <https://goo.gl/Ry4tKM>; Stand: 03.09.2016. CC BY-SA 4.0.
- Abb. 193:** Realisierungen der Konstruktionen mit *gehören* (KERN-Korpus) im Präsens. Direktlink: <https://goo.gl/z00gjr>; Stand: 03.09.2016. Legende: <https://goo.gl/GRkY8p>. CC BY-SA 4.0.
- Abb. 194:** Realisierungen der Konstruktion *gehören* quantifiziert nach morphologischer Form, Kommunikationsdomäne und chronologischer Einordnung. Direktlink: <https://goo.gl/7zFTdg>; Stand: 03.09.2016. CC BY-SA 4.0.
- Abb. 195:** Verwendete Qualitative in Konstruktionen mit *gehören* geordnet nach Kommunikationsdomäne und Tempus. Direktlink: <https://goo.gl/sM2dTL>; Stand: 03.09.2016. CC BY-SA 4.0.
- Abb. 196:** Schichtung des ZEIT-Korpus (Stand: 13.10.2014). Direktlink: <https://goo.gl/P609YI>; Stand: 03.09.2016. CC BY-SA 4.0.
- Abb. 197:** Realisierungen der Konstruktion mit *gehören* (ZEIT-Korpus) nach morphologischer Form des Verbs und Modus. Direktlink: <https://goo.gl/qjnAsv>; Stand: 03.09.2016. CC BY-SA 4.0.
- Abb. 198:** Chronologische Verteilung der Konstruktionsrealisierungen mit *gehören* mit Angabe der morphologischen Formen. Direktlink: <https://goo.gl/EIhlsT>; Stand: 03.09.2016. CC BY-SA 4.0.
- Abb. 199:** Chronologische Verteilung der Konstruktionsrealisierungen mit *gehören* nach Modus. Direktlink: <https://goo.gl/Fbd5Wx>; Stand: 03.09.2016. CC BY-SA 4.0.
- Abb. 200:** Die je 30 häufigsten Qualitative mit *gehören* nach Modus und Tempus. Direktlink: <https://goo.gl/vFTKuf>; Stand: 03.09.2016. CC BY-SA 4.0.
- Abb. 201:** Konstruktion der AKZEPTATION mit resultativer Relation zwischen Verb- und Konstruktionsbedeutung und *haben*. Direktlink: <https://goo.gl/X45rNB>; Stand: 03.09.2016. CC BY-SA 4.0.
- Abb. 202:** Konstruktion der ASKRPTION mit *wirken* in direkter Relation zwischen Verb- und Konstruktionsbedeutung. Direktlink: <https://goo.gl/rpEulq>; Stand: 03.09.2016. CC BY-SA 4.0.
- Abb. 203:** Die nonagentiven Konstruktionen im Konstruktikon, Ausschnitt. Das Konstruktikon liegt vollständig auf einem Faltblatt bei und kann als frei skalierbares PDF abgerufen werden unter: <http://goo.gl/WjFizb>; Stand: 03.09.2016. CC BY-SA 4.0.

## 2 Belegsammlungen

### 2.1 ASKRIPTION

*sein* (<https://goo.gl/LS5aNK>; Stand: 03.09.2016).

*bleiben* (<https://goo.gl/sfAa8s>; Stand: 03.09.2016).

*scheinen* (<https://goo.gl/5YvKiw>; Stand: 03.09.2016).

*erscheinen* (<https://goo.gl/Xj7EW6>; Stand: 03.09.2016).

*wirken* (<https://goo.gl/yCai8B>; Stand: 03.09.2016).

*aussehen* (<https://goo.gl/xUng8v>; Stand: 03.09.2016).

### 2.2 KOMMUTATION

*werden* (<https://goo.gl/PcKaN2>; Stand: 03.09.2016).

### 2.3 AKZEPTATION

*bekommen* (<https://goo.gl/aEw9rC>; Stand: 03.09.2016).

*kriegen* (<https://goo.gl/zaUHBH>; Stand: 03.09.2016).

*erhalten* (<https://goo.gl/GBm2vT>; Stand: 03.09.2016).

### 2.4 Intermediäre Konstruktionen

*gehören* im KERN-Korpus (<https://goo.gl/YIPuaN>; Stand: 03.09.2016).

*gehören* im ZEIT-Korpus (<https://goo.gl/VPJbAb>; Stand: 03.09.2016).
