# Supplementary material
Source: publisher site journal article supplement (https://www.degruyterbrill.com/publication/isbn/9783110495430/downloadAsset/9783110495430_Abbildungen_SUW25.zip)

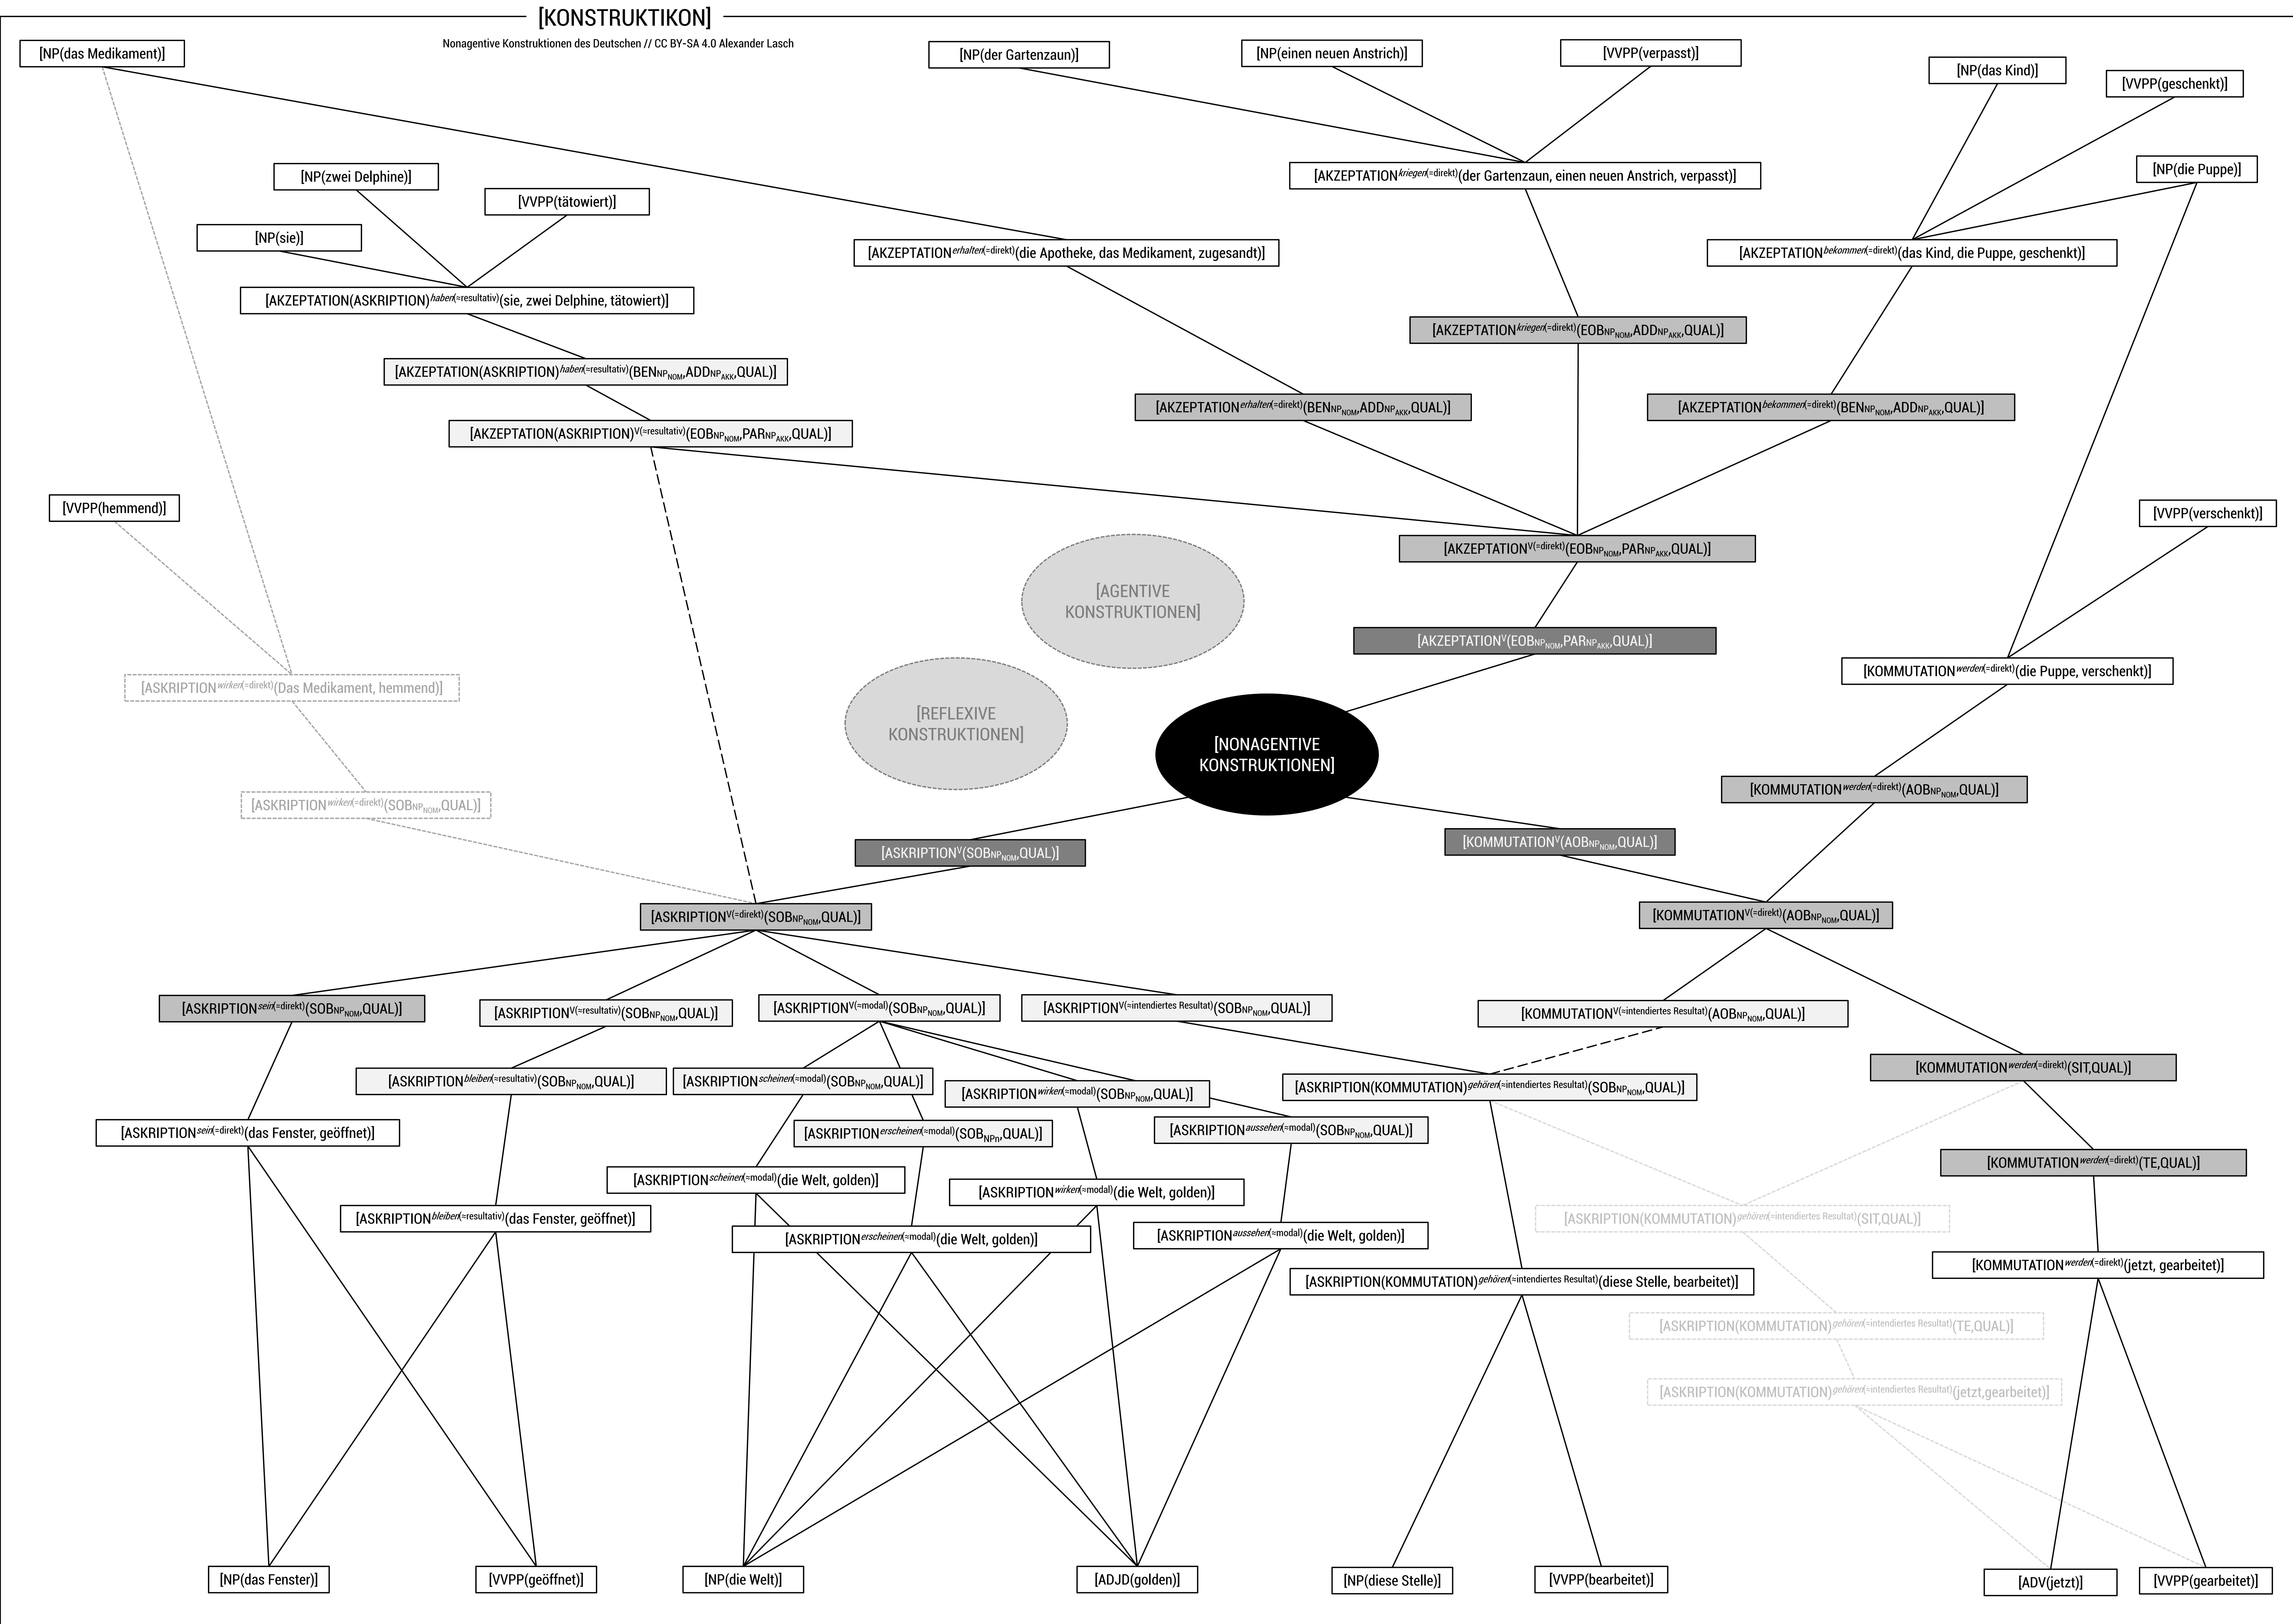

Supplement: Supplementary file 2 [file 203 (Nonagentive Konstruktionen des Deutschen_CC BY-SA 4.0 Alexander Lasch).pdf › Abbildungen/203 (Nonagentive Konstruktionen des Deutschen_CC BY-SA 4.0 Alexander Lasch).pdf]
